# Supplementary material
Source: MDPI journal article supplement (https://www.mdpi.com/1424-2818/15/12/1204)
Supplement: s1 [file s1]

## Supplementary Materials:

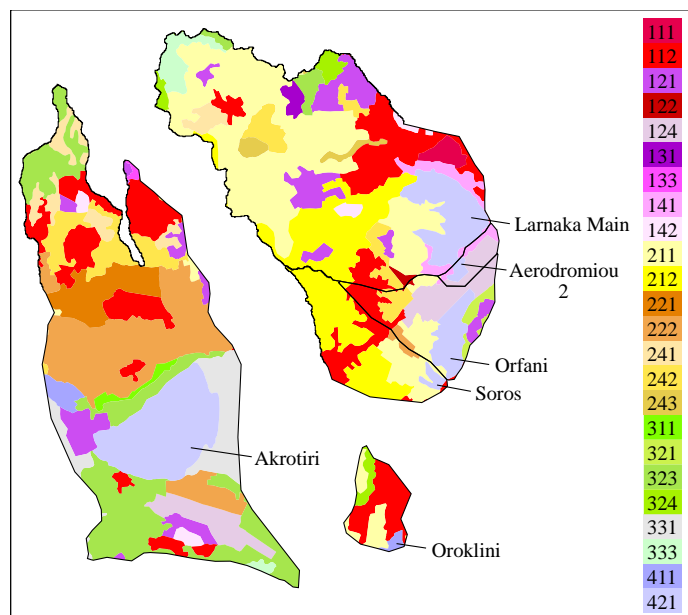

**Supplementary Figure S1.** Land use coverage of Akrotiri, Larnaka's network of lakes (each lake's catchment is defined by the black line) and Oroklini lake catchments (111: Continuous urban fabric, 112: Discontinuous urban fabric, 121: Industrial or commercial units, 122: Road and rail networks and associated land, 124: Airports, 131: Mineral extraction sites, 133: Construction sites, 141: Green urban areas, 142: Sport and leisure facilities, 211: Non-irrigated arable land, 212: Permanently irrigated land, 221: Vineyards, 222: Fruit trees and berry plantations, 241: Annual crops associated with permanent crops, 242: Complex cultivation patterns, 243: Land principally occupied by agriculture, with significant areas of natural vegetation, 311: Broad-leaved forest, 321: Natural grasslands, 323: Sclerophyllous vegetation, 324: Transitional woodland-shrub, 331: Beaches, dunes, sands, 333: Sparsely vegetated areas, 411: Inland marshes, 421: Salt marshes). Relative positions of catchments do not represent their true positions.

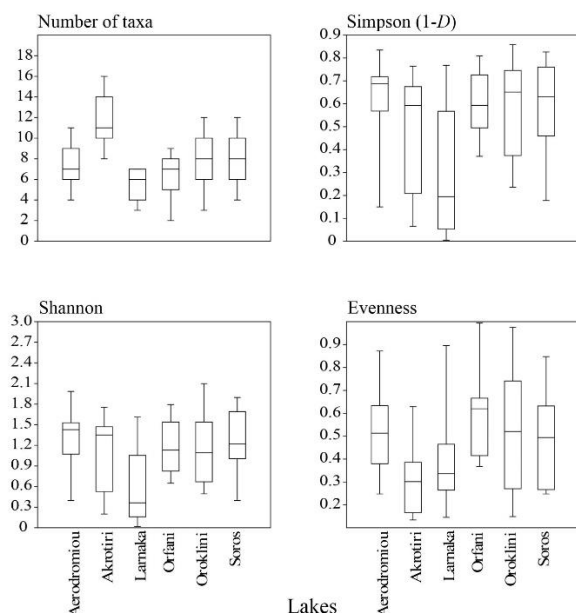

**Supplementary Figure S2.** Boxplots of the number of taxa (S), and the Simpson (1-D), Shannon (H) and Evenness (eH/S) indices in the lakes throughout the study. Mid-line: median, box limits: first and third quartiles, whiskers: one sigma.

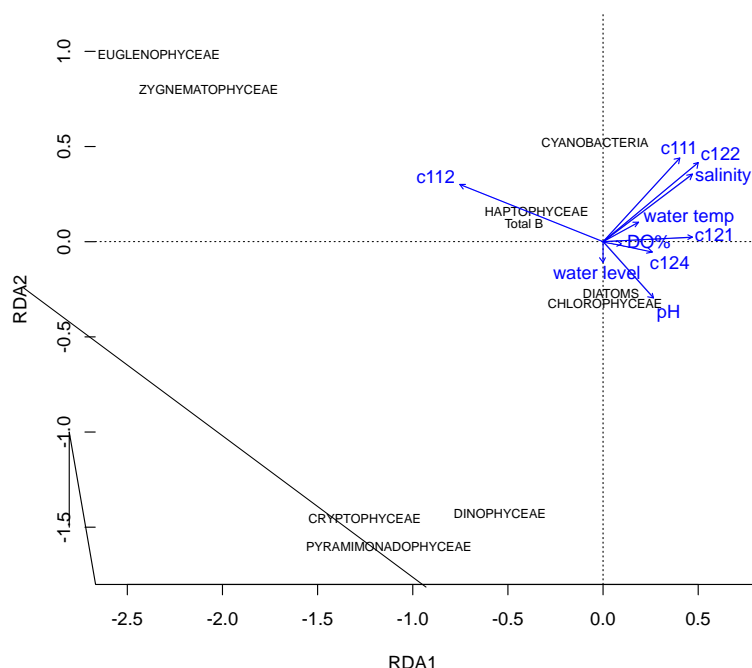

**Supplementary Figure S3.** Constrained ordination plot (linear RDA) of explanatory variables (environmental factors and land use coverage) over phytoplankton taxonomic group biomass. Ordination axes 1 (horizontal) and 2 (vertical) are shown. Land use coverage codes: c111: continuous urban fabric, c112: discontinuous urban fabric, c121: industrial or commercial units, c122: road and rail networks and associated land, c124: airports.

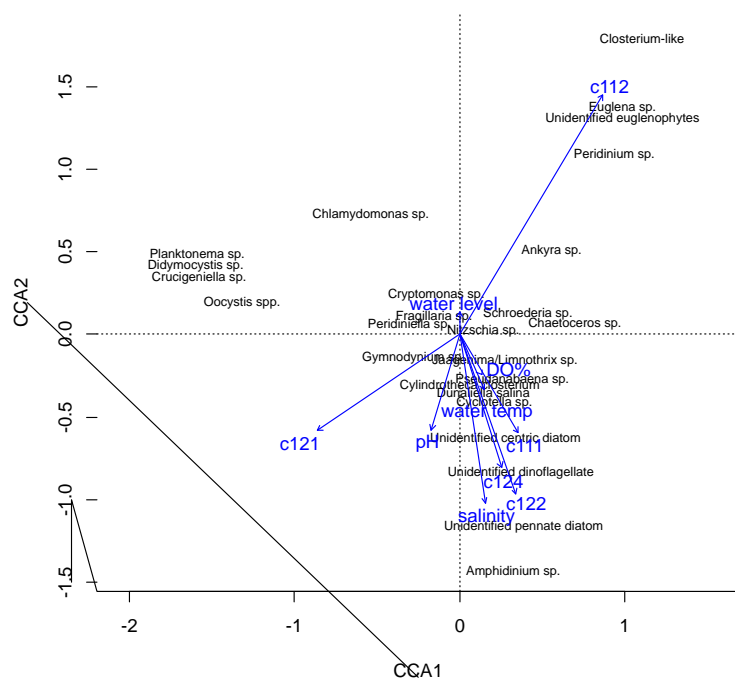

**Supplementary Figure S4.** Constrained ordination plot (unimodal CCA) of explanatory variables (environmental factors and land use coverage) over phytoplankton dominant species biomass. Ordination axes 1 (horizontal) and 2 (vertical) are shown. Land use coverage codes: c111: continuous urban fabric, c112: discontinuous urban fabric, c121: industrial or commercial units, c122: road and rail networks and associated land, c124: airports.

**Supplementary Table S1.** *In situ* measurements of physico-chemical parameters (water level, water temperature, salinity, electrical conductivity, dissolved oxygen and pH).

| Lake          | Date     | Water level (m) | Water temp. (°C) | Salinity (psu, ‰) | El. cond. (μS/cm) | DO (mg/L) | pH   |
|---------------|----------|-----------------|------------------|-------------------|-------------------|-----------|------|
| Aerodromiou 2 | 08/02/18 | 0.34            | 16.4             | 33.6              | 51700             | 10.23     | 8.91 |
|               | 27/02/18 | 0.38            | 18               | 29.1              | 45300             | 13.18     | 8.73 |
|               | 20/03/18 | 0.30            | 21.4             | 39.3              | 59300             | 11.81     | 9.67 |
|               | 12/04/18 | 0.19            | 22               | 59.5              | 84300             | 9.80      | 8.87 |
|               | 11/12/18 | 0.40            | 16.6             | 16.1              | 26700             | 12.79     | 9.24 |
|               | 08/01/19 | 0.40            | 11.8             | 10.2              | 12876             | 14.84     | 8.90 |
|               | 30/01/19 | 0.34            | 13.6             | 16.6              | 21077             | 5.86      | 8.14 |
|               | 20/02/19 | 0.47            | 17               | 15.2              | 21000             | 7.60      | 8.53 |
|               | 13/03/19 | 0.56            | 17.7             | 24                | 32450             | 5.02      | 8.49 |
|               | 03/04/19 | 0.59            | 16.5             | 27.5              | 35777             | 8.01      | 8.37 |
|               | 08/05/19 | 0.52            | 23.9             | 37.7              | 55221             | 6.97      | 8.71 |
|               | 05/06/19 | 0.36            | 27.1             | 63.4              | 92600             | 4.79      | 8.35 |
|               | 03/07/19 | 0.18            | 30.6             | 133.9             | 166980            | 2.33      | 7.82 |
| Akrotiri      | 07/02/18 | 0.17            | 17               | 38.6              | 58400             | 9.68      | 8.20 |
|               | 28/02/18 | 0.35            | 19.2             | 29.4              | 45700             | 9.09      | 8.07 |
|               | 22/03/18 | 0.29            | 20               | 35.8              | 54400             | 9.45      | 8.37 |
|               | 11/04/18 | 0.26            | 19.5             | 42.8              | 63900             | 8.86      | 8.27 |
|               | 02/05/18 | 0.13            | 23.9             | 55.9              | 79700             | 9.25      | 8.49 |
|               | 15/05/18 | 0.11            | 25               | 71.4              | 97200             | 8.88      | 7.95 |
|               | 09/01/19 | 0.38            | 8.7              | 18.5              | 20733             | 8.77      | 8.11 |
|               | 29/01/19 | 0.61            | 13.8             | 19.5              | 24384             | 6.68      | 8.18 |
|               | 19/02/19 | 0.87            | 13.8             | 15.8              | 20238             | 6.53      | 8.11 |
|               | 12/03/19 | 0.92            | 16.4             | 16.7              | 22589             | 6.54      | 8.47 |
|               | 02/04/19 | 0.97            | 15.5             | 13.8              | 10705             | 7.20      | 8.10 |
|               | 07/05/19 | 0.83            | 21.3             | 20                | 29637             | 5.81      | 9.11 |
|               | 04/06/19 | 0.71            | 28               | 24.3              | 40500             | 4.73      | 8.85 |
|               | 02/07/19 | 0.54            | 27.2             | 31.9              | 51300             | 4.85      | 8.21 |
| Larnaka Main  | 08/02/18 | 0.29            | 16.6             | 151.5             | 165400            | 9.45      | 7.90 |
|               | 27/02/18 | 0.40            | 17               | 98.6              | 133400            | 3.78      | 7.67 |
|               | 20/03/18 | 0.35            | 20.4             | 107.4             | 157500            | 6.72      | 7.59 |
|               | 12/04/18 | 0.29            | 21.6             | 199.5             | 187000            | 6.43      | 7.35 |
|               | 03/05/18 | 0.14            | 27.6             | 275               | 214000            | 10.84     | 7.31 |
|               | 16/05/18 | 0.11            | 27.8             | 323               | 210000            | 8.34      | 7.44 |
|               | 11/12/18 | 0.28            | 16.4             | 89.04             | 118200            | 10.38     | 8.45 |
|               | 08/01/19 | 0.55            | 12               | 72                | 74500             | 10.35     | 8.55 |
|               | 30/01/19 | 0.59            | 13.1             | 66.1              | 71650             | 3.91      | 7.88 |
|               | 20/02/19 | 0.89            | 14.5             | 43.6              | 51986             | 6.36      | 8.02 |
|               | 13/03/19 | 0.86            | 18.1             | 44.5              | 56808             | 6.24      | 8.19 |
|               | 03/04/19 | 0.95            | 16.5             | 43.3              | 53491             | 7.17      | 8.03 |
|               | 08/05/19 | 0.99            | 20.5             | 50                | 66170             | 4.13      | 8.81 |
|               | 05/06/19 | 0.80            | 26.6             | 59                | 86475             | 3.51      | 8.89 |
|               | 03/07/19 | 0.62            | 28.9             | 85.5              | 116767            | 3.86      | 8.63 |
| Orfani        | 08/02/18 | 0.17            | 16.4             | 83.6              | 107000            | 9.33      | 8.14 |
|               | 27/02/18 | 0.20            | 18.3             | 72.8              | 101300            | 10.39     | 8.13 |
|               | 11/12/18 | 0.22            | 17.8             | 42.7              | 63900             | 10.45     | 8.20 |
|               | 08/01/19 | 0.50            | 11.4             | 30.7              | 35122             | 8.23      | 8.18 |
|               | 30/01/19 | 0.58            | 13.6             | 32.4              | 38702             | 6.19      | 8.12 |

|          |          |      |       |        |        |       |      |
|----------|----------|------|-------|--------|--------|-------|------|
|          | 20/02/19 | 0.77 | 16.4  | 25.8   | 33680  | 7.13  | 8.17 |
|          | 13/03/19 | 0.75 | 18.6  | 21.4   | 29807  | 7.74  | 8.58 |
|          | 03/04/19 | 0.70 | 17    | 30.7   | 39990  | 7.52  | 7.89 |
|          | 08/05/19 | 0.60 | 21.7  | 39.1   | 55001  | 8.25  | 8.20 |
|          | 05/06/19 | 0.44 | 28.5  | 57.5   | 87645  | 3.84  | 8.33 |
|          | 03/07/19 | 0.25 | 31.4  | 120.67 | 154300 | 4.5   | 7.95 |
| Oroklini | 06/02/18 | 0.40 | 16.1  | 6.4    | 11310  | 9.71  | 8.52 |
|          | 22/02/18 | 0.50 | 15.1  | 5.3    | 9510   | 9.46  | 8.39 |
|          | 20/03/18 | 0.40 | 18    | 20.4   | 10940  | 8.20  | 6.20 |
|          | 12/04/18 | 0.50 | 20.9  | 6.8    | 11870  | 8.97  | 8.09 |
|          | 03/05/18 | 0.48 | 23.6  | 7.95   | 13780  | 9.20  | 8.40 |
|          | 14/06/18 | 0.45 | 28.5  | 16.5   | 26700  | 10.97 | 8.78 |
|          | 12/12/18 | 0.48 | 13.6  | 7.4    | 13050  | 5.97  | 8.22 |
|          | 10/01/19 | 0.38 | 11.5  | 4.7    | 6187   | 6.97  | 8.08 |
|          | 30/01/19 | 0.37 | 15.2  | 5.3    | 7641   | 6.41  | 7.91 |
|          | 20/02/19 | 0.37 | 17.6  | 3      | 4810   | 6.5   | 7.86 |
|          | 13/03/19 | 0.45 | 20.3  | 4      | 6586   | 4.35  | 7.74 |
|          | 03/04/19 | 0.70 | 19.7  | 3.1    | 5110   | 9.23  | 8.02 |
|          | 09/05/19 | 0.68 | 22.2  | 5.3    | 8914   | 9.94  | 9.59 |
|          | 05/06/19 | 0.64 | 27    | 7.4    | 13126  | 8.31  | 9.21 |
|          | 03/07/19 | 0.62 | 29.8  | 8.1    | 15372  | 7.84  | 8.20 |
| Soros    | 08/02/18 | 0.19 | 17    | 161.7  | 144500 | 14.44 | 8.42 |
|          | 27/02/18 | 0.25 | 18.3  | 108.2  | 133000 | 9.52  | 7.59 |
|          | 20/03/18 | 0.19 | 24.6  | 114.2  | 158600 | 9.15  | 7.50 |
|          | 11/12/18 | 0.50 | 17.93 | 33.2   | 51300  | 9.78  | 8.04 |
|          | 08/01/19 | 0.80 | 12.2  | 24.4   | 29009  | 9.20  | 8.54 |
|          | 30/01/19 | 0.86 | 13.8  | 24.8   | 30593  | 6.01  | 8.22 |
|          | 20/02/19 | 1.10 | 16.1  | 19.7   | 26148  | 7.96  | 8.44 |
|          | 13/03/19 | 1.08 | 18.8  | 28.3   | 38300  | 6.197 | 8.18 |
|          | 03/04/19 | 0.95 | 17.3  | 22.5   | 30575  | 9.09  | 9.12 |
|          | 08/05/19 | 0.90 | 22.6  | 27.3   | 40017  | 8.66  | 9.75 |
|          | 05/06/19 | 0.71 | 28.5  | 35     | 56844  | 5.65  | 9.16 |
|          | 03/07/19 | 0.52 | 29.9  | 51.8   | 82082  | 5.84  | 8.36 |
